# Supplementary material for: Interactions between Carotenoids from Marine Bacteria and Other Micronutrients: Impact on Stability and Antioxidant Activity
Source: MDPI journal article supplement (doi:10.3390/md13117020), 2015-11-19
Supplement: s1 [file s1]

**Supplementary Materials**


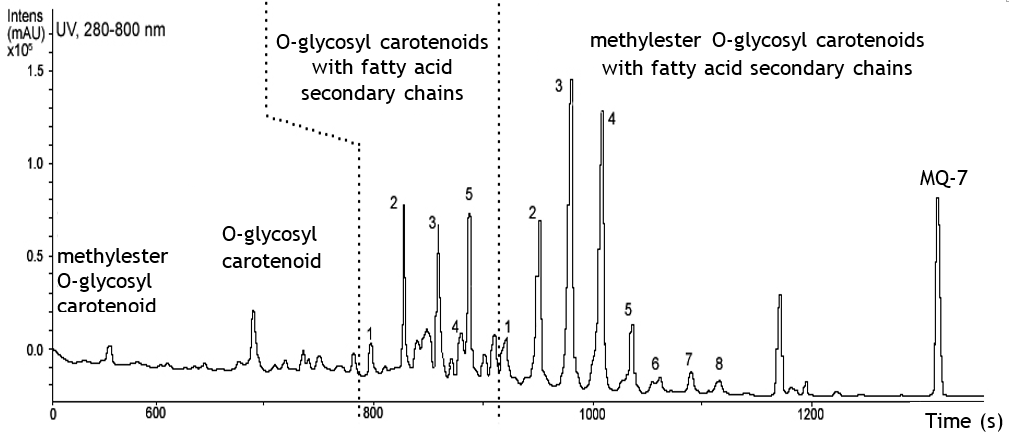


**Figure S1.** A UV-VIS chromatogram (200–800 nm) of the crude bacterial extract of HU36 containing carotenoids and MQ-7.

**Figure S2.** Iron-induced autoxidation of carotenoids HU36 (10 μmol·L−1) with and without MQ-7. The *Y*-axis displays the residual carotenoid concentration after 4 h of reaction at
pH 4. Initial iron concentrations were selected so as to maximize autoxidation after 4 h:
50 μmol·L−1 FeII, 100 μmol·L−1 FeIII and 0.5 μmol·L−1 MbFeIII. Different letters indicate a significant difference between residual carotenoid concentrations (ANOVA followed by the Tukey-Kramer post-hoc test, *p* < 0.05).

|  |
| --- |
|  |
|  |

**Figure S3.** The percentage of residual β-carotene (**A**), lycopene (**B**) and lycopene + β-carotene (carotenes) (**C**) remaining during FeII-induced autoxidation at pH 4. FeII/carotenoid molar ratio = 0, 0.1, 0.5, 1.0 and 5.0.

|  |
| --- |
|  |
|  |

**Figure S4.** The percentage of residual β-carotene (**A**), lycopene (**B**) and lycopene + β-carotene (carotenes) (**C**) during FeIII-induced autoxidation at pH 4. FeIII/carotenoid molar ratio = 0, 0.1, 0.5, 1.0, 5.0 and 10.0.

| 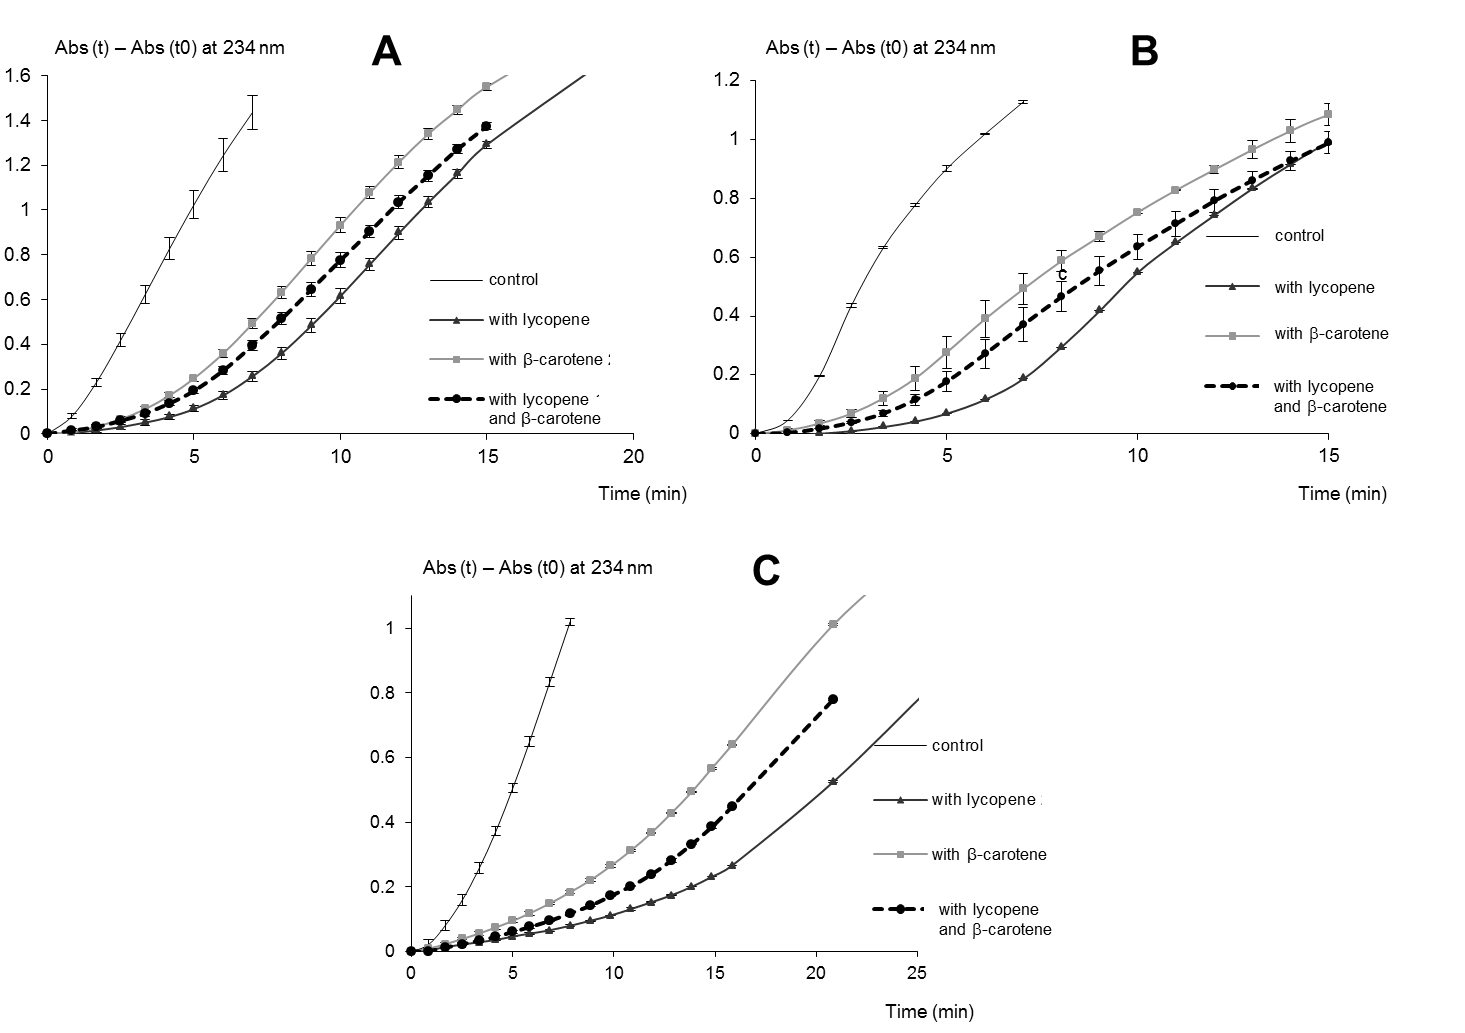 |
| --- |
| 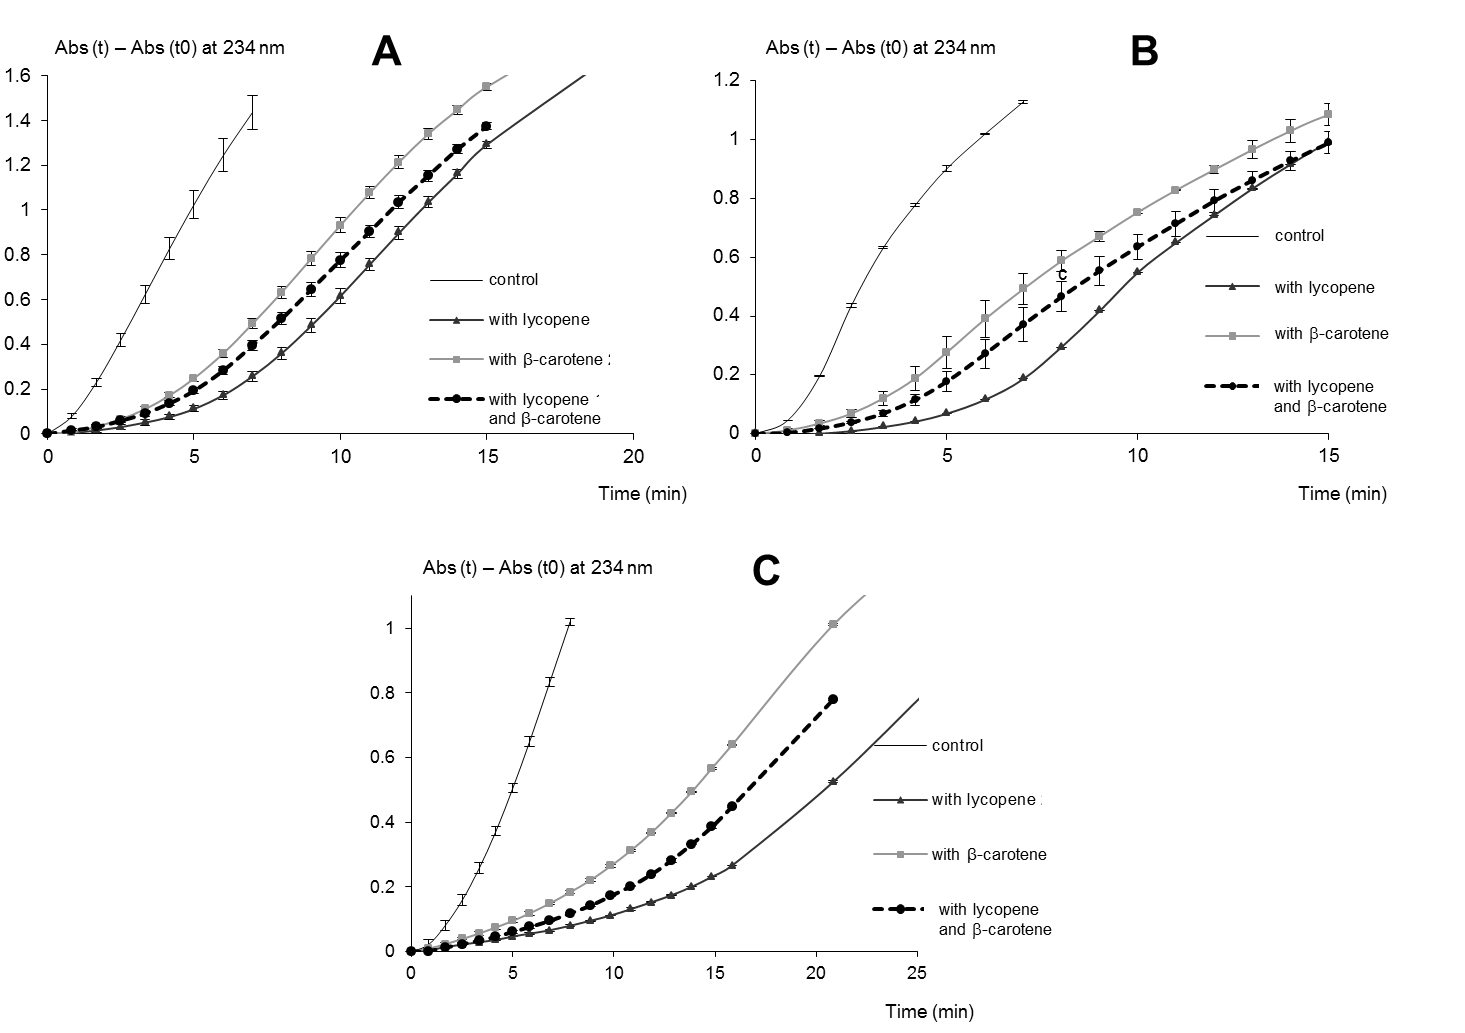 |
| 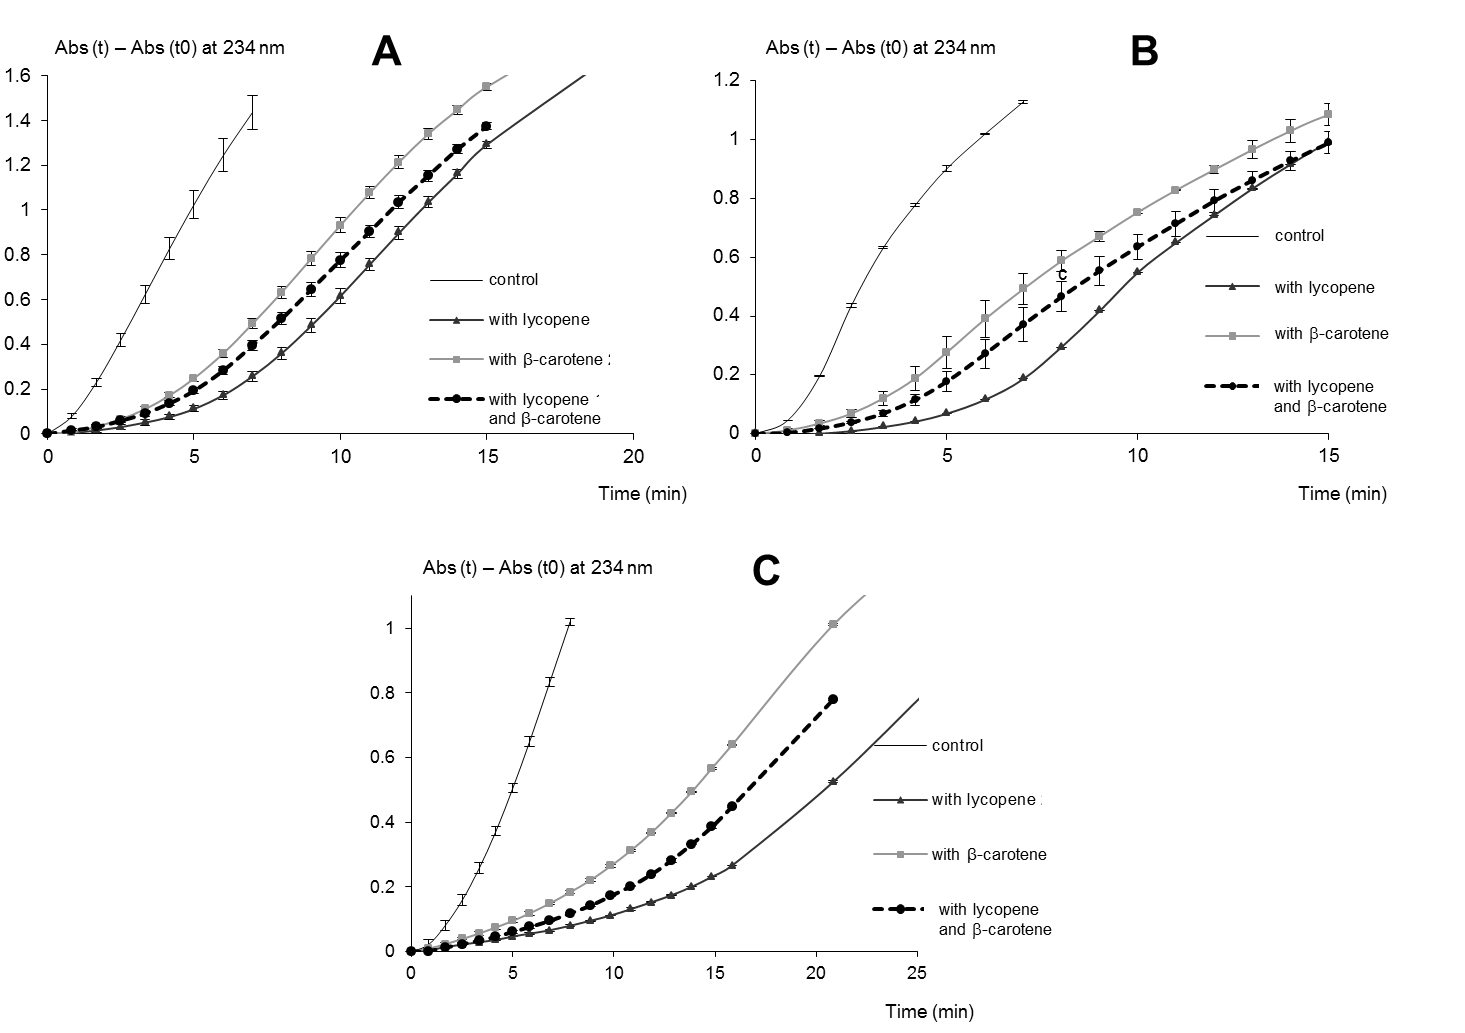 |

**Figure S5.** Inhibition of CD accumulation during linoleic acid peroxidation by lycopene
(1 μmol·L−1), β-carotene (1 μmol·L−1) and by a 1:1 mixture of both with the same total concentration of 2 μmol·L−1. Initiation by MbFeIII, pH 5.8 (**A**) MbFeIII, pH 4 (**B**) and FeII, pH 4 (**C**).

**Figure S6.** Kinetic monitoring of ferrylmyoglobin formation (60 μmol·L−1 MbFeIII +
30 μmol·L−1 H2O2) at pH 7, and its subsequent reduction by antioxidants (100 μmol·L−1):
β-carotene (a), HU36 carotenoids (b), α-tocopherol (c), and chlorogenic acid (d).

© 2015 by the authors; licensee MDPI, Basel, Switzerland. This article is an open access article distributed under the terms and conditions of the Creative Commons Attribution license (http://creativecommons.org/licenses/by/4.0/).
